# Supplementary material for: Real time monitoring of chemical transformations during catalytic reduction using gas source mass spectrometry: carbon/zinc carbonate hydroxide
Source: Royal Society of Chemistry journal article supplement (doi:10.1039/c004179c), 2010-01-01
Supplement: c004179c.pdf [file c004179c.pdf]

**Real time monitoring of chemical transformations during catalytic reduction using gas source mass spectrometry: carbon / zinc carbonate hydroxide**

**Anil Gopala<sup>a</sup>, Norbert Jakubowski<sup>a</sup>, Ulrich Panne<sup>a,b</sup>, and Heinrich Kipphardt<sup>a,\*</sup>**

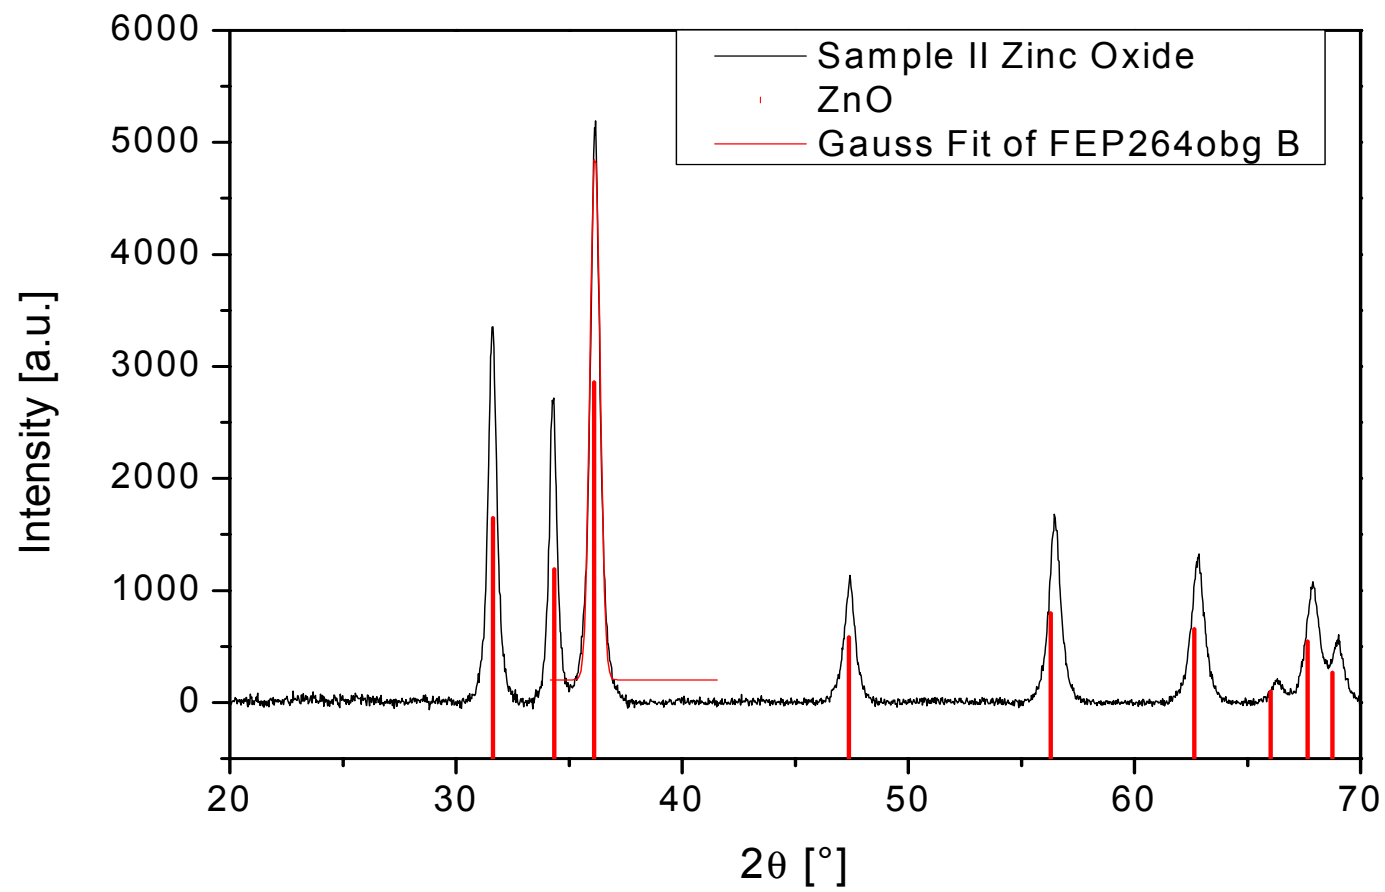

Figure S1. XRD of insitu prepared ZnO

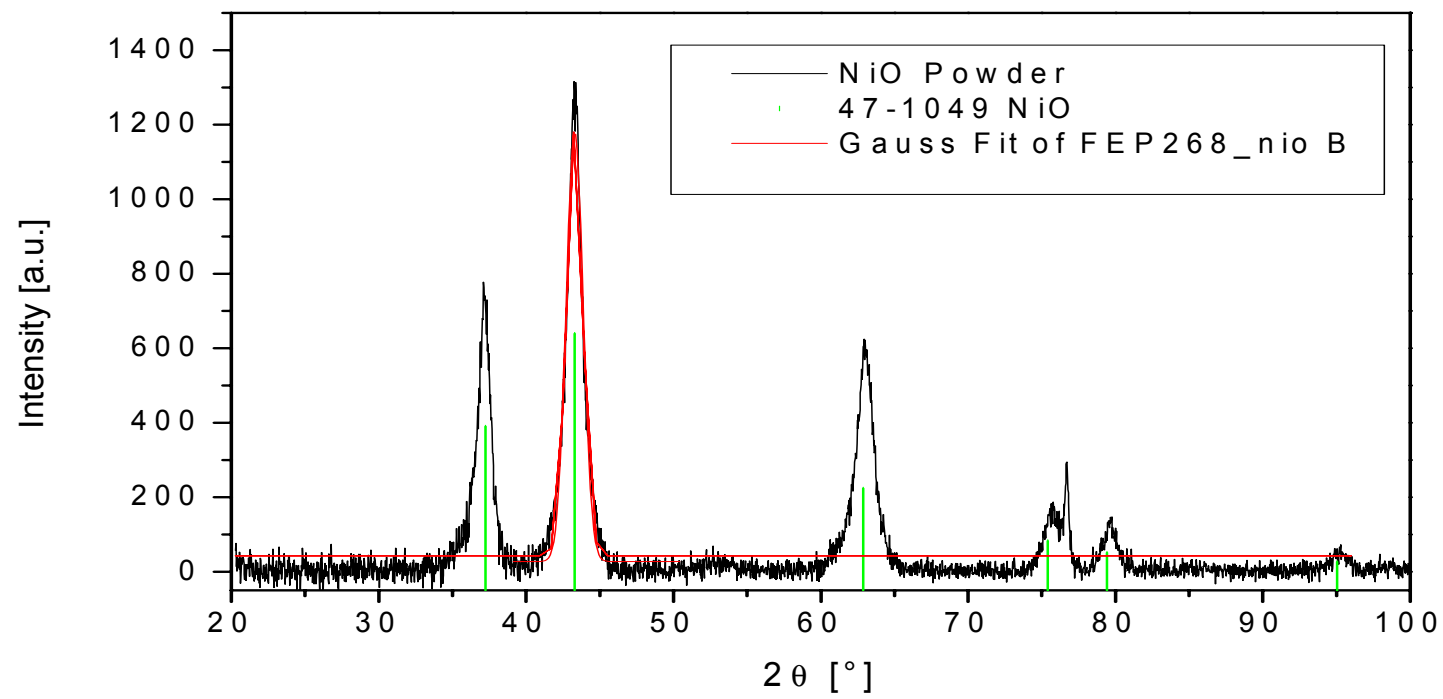

Figure S2. XRD of insitu prepared NiO
